# Supplementary material for: First-principles study on the adsorption and sensing properties of methyl acetate on VTe2 doped systems (Ti, Sc, Ru, Y)
Source: Royal Society of Chemistry journal article supplement (doi:10.1039/d4cp03497j), 2024-01-01
Supplement: d4cp03497j1.pdf [file d4cp03497j1.pdf]

## Supporting Information

# Adsorption and sensing properties of Methyl Acetate on VTe<sub>2</sub> Doped Systems (Ti, Sc, Ru, Y) from First-Principles

*Guan-Nan Wang*<sup>a,b</sup>, *Hong Zhang*<sup>a,b,\*</sup>

<sup>a</sup> College of Physics, Sichuan University, Chengdu 610065, China

<sup>b</sup> Key Laboratory of High Energy Density Physics and Technology (Ministry of Education), Sichuan University, Chengdu 610065, China

---

\* Corresponding author: Hong Zhang.

Email address: [hongzhang@scu.edu.cn](mailto:hongzhang@scu.edu.cn) (Hong Zhang).

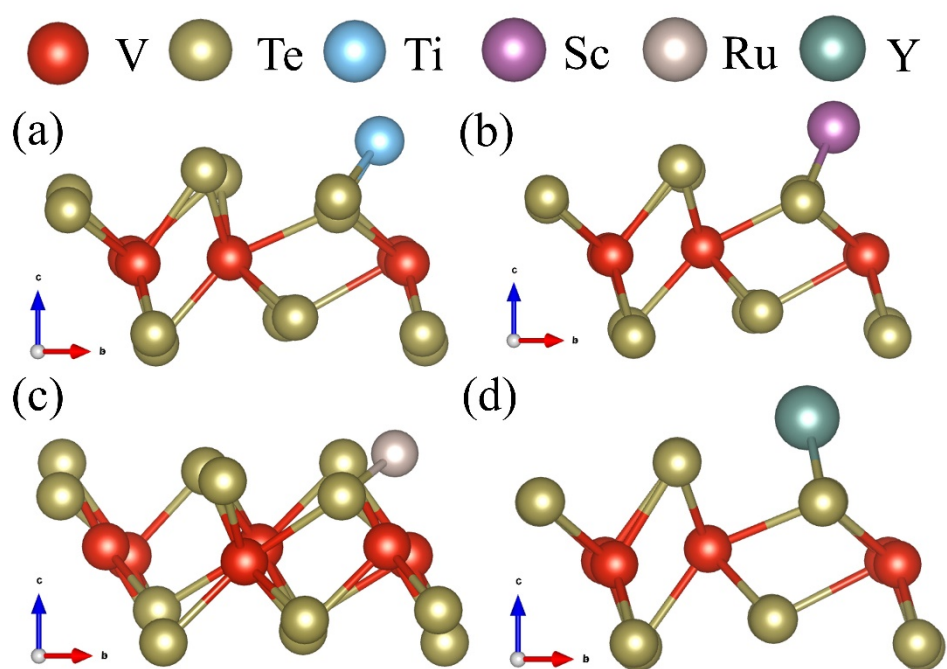

**Figure S1.** AIMD simulations for (a) VTe<sub>2</sub>+Ti, (b) VTe<sub>2</sub>+Sc, (c) VTe<sub>2</sub>+Ru, and (d) VTe<sub>2</sub>+Y.

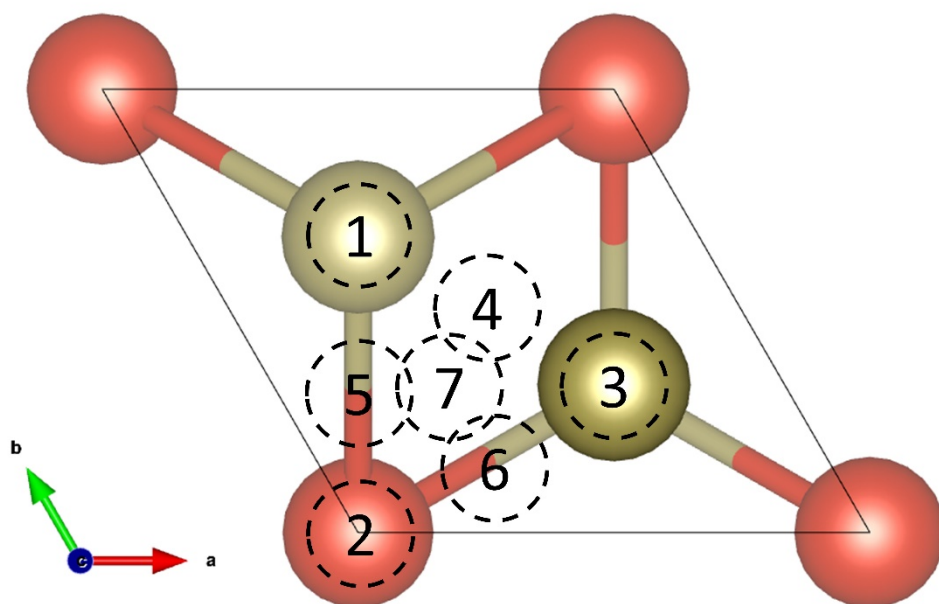

**Figure S2.** Adsorption sites for methyl acetate on the surface of VTe<sub>2</sub>, 1, 2, and 3 correspond to the top, hcp, and fcc sites.

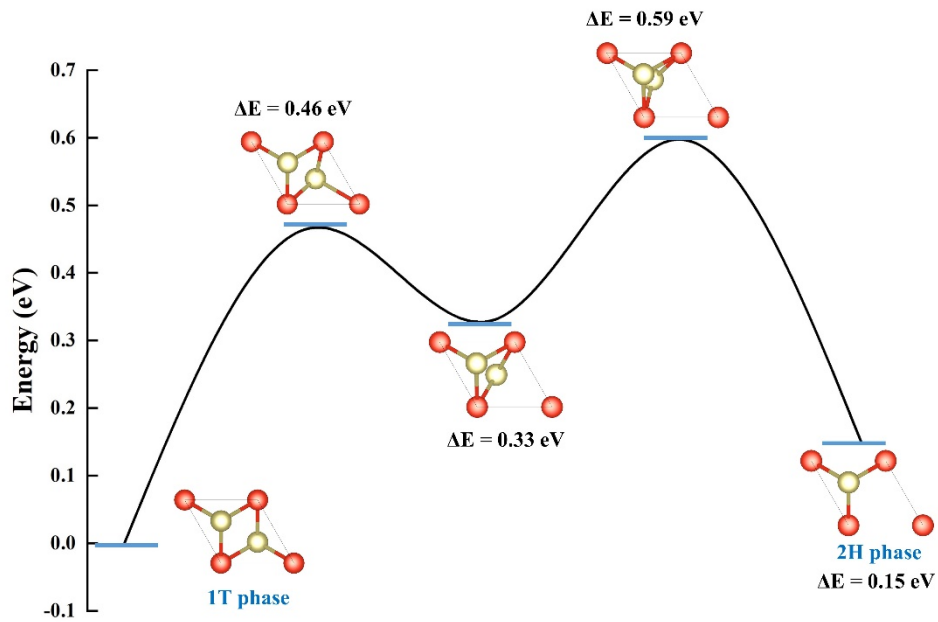

**Figure S3.** Phase transition curves of 1T and 2H phases within a single cell of VTe<sub>2</sub>, and the energy obtained from DFT calculations.

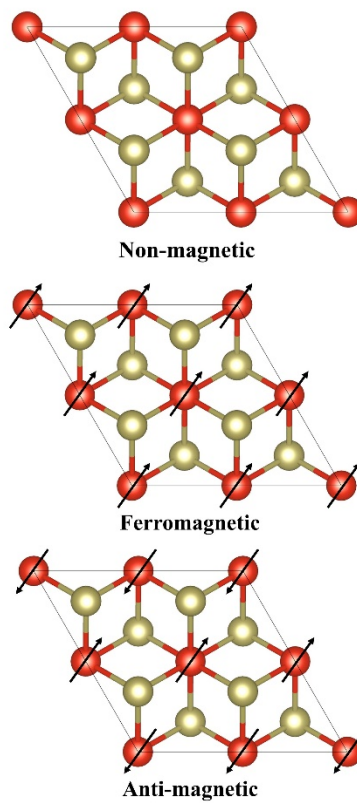

**Figure S4** The three considered magnetic configurations of VTe<sub>2</sub> are non-magnetic, ferromagnetic, and antiferromagnetic.

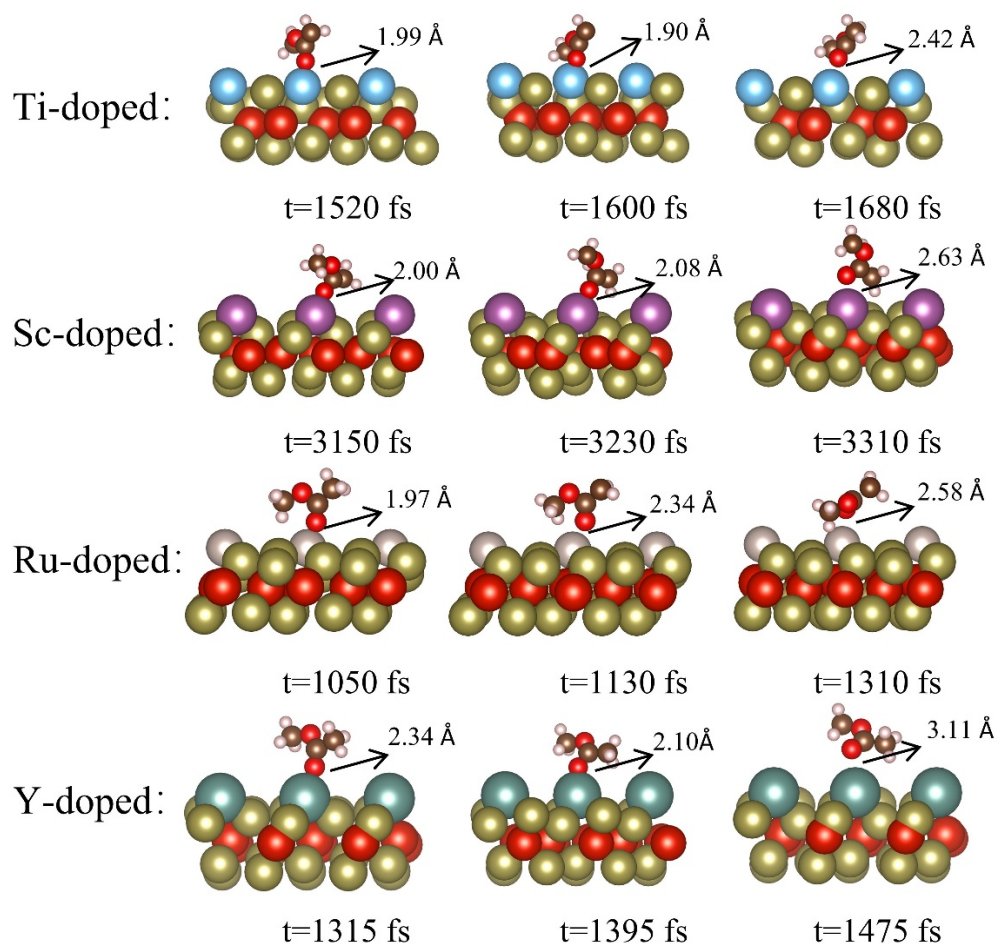

**Figure S5.** The partial trajectories and distances of molecular desorption at 800K.

**Table S1.** The adsorption energies of methyl acetate molecules at seven different sites.

| site    | Potential energy (eV) | Adsorption energy(eV) |
|---------|-----------------------|-----------------------|
| 1 (top) | -116.00               | -0.18                 |
| 2 (hcp) | -116.02               | -0.20                 |
| 3 (fcc) | -116.16               | -0.34                 |
| 4       | -115.61               | +0.21                 |
| 5       | -115.71               | +0.11                 |
| 6       | -116.16               | -0.34                 |
| 7       | -115.87               | -0.05                 |

**Table S2.** The adsorption energies of several candidate metal atoms and the adsorption energies of methyl acetate gas on their doped surfaces.

| Metal atom | Adsorption energy for metal atoms<br>(eV) | Adsorption energy for molecule<br>(eV) |
|------------|-------------------------------------------|----------------------------------------|
| Fe         | -3.56                                     | -0.09                                  |
| Al         | -2.98                                     | -0.06                                  |
| Cu         | -1.75                                     | -1.75                                  |
| Zn         | +0.09                                     | —                                      |
| Mn         | +1.16                                     | —                                      |
| Mg         | -1.68                                     | -1.68                                  |
| Mo         | -1.01                                     | -3.44                                  |
| Ni         | -4.38                                     | 0.38                                   |

**Table S3.** Spin up, spin down, and total band gap upon doping.

| Structure            | Spin Up<br>(meV) | Spin Down<br>(meV) | Total Band Gap<br>(meV) |
|----------------------|------------------|--------------------|-------------------------|
| VTe <sub>2</sub> +Ti | 9.7              | 15.3               | 9.7                     |
| VTe <sub>2</sub> +Sc | 9.1              | 18.8               | 9.1                     |
| VTe <sub>2</sub> +Ru | 19.0             | 9.5                | 5.0                     |
| VTe <sub>2</sub> +Y  | 13.4             | 31.9               | 13.4                    |

**Table S4.** Coordinates for the Ti-doped system.

|    | X                   | Y                  | Z                  |
|----|---------------------|--------------------|--------------------|
| V  | -0.0413493327147601 | 0.0200397159537981 | 0.1005526545751598 |
| V  | 0.4649609914016448  | 0.0516209258480980 | 0.0961226299367035 |
| V  | 0.0147329652717953  | 0.4931940444276510 | 0.1014881098605952 |
| V  | 0.4629667034563535  | 0.4845638543781143 | 0.0965739889553835 |
| Te | 0.3085200620226728  | 0.3458085996592411 | 0.9906555664355446 |
| Te | 0.1572631010020561  | 0.1548779963889998 | 0.2062375496026223 |
| Te | 0.8103521821528216  | 0.3511461091614472 | 0.0058926859229011 |
| Te | 0.6449090853449800  | 0.1773713962442842 | 0.2032399788097209 |
| Te | 0.3074320971601283  | 0.8462446904974306 | 0.0091134778521925 |
| Te | 0.1564408545001195  | 0.6873653057754332 | 0.2071458941321989 |
| Te | 0.8103796979701151  | 0.8377802250413150 | 0.0053237554343153 |
| Te | 0.6275709548444988  | 0.6861257214004672 | 0.1845449604171530 |
| Te | 0.9525705526018799  | 0.5220913770571691 | 0.2649187760280349 |

**Table S5.** Coordinates for the Sc-doped system.

|    | X                   | Y                  | Z                   |
|----|---------------------|--------------------|---------------------|
| V  | -0.0451766074501604 | 0.0134358135222976 | 0.1004636425942522  |
| V  | 0.4937553296066067  | 0.0393131137034203 | 0.0955991176958591  |
| V  | 0.0063254144535790  | 0.5120962290323625 | 0.0974688403517291  |
| V  | 0.4558925396000622  | 0.4905777848843141 | 0.1005329115076292  |
| Te | 0.3080466078264945  | 0.3441889186913086 | 0.9930240501480312  |
| Te | 0.1569906593703373  | 0.1565960109249143 | 0.1946390801214208  |
| Te | 0.8102933594304783  | 0.3496505714439382 | 0.0089975695224231  |
| Te | 0.6434163010858376  | 0.1805499392362115 | 0.2042967099952168  |
| Te | 0.3086424718707251  | 0.8510723386385338 | 0.0107864887308197  |
| Te | 0.1487004844279736  | 0.6878271769492850 | 0.2090724401554652  |
| Te | 0.8116198656187131  | 0.8433266867054197 | -0.0010050522514250 |
| Te | 0.6276953925037290  | 0.6857810161227620 | 0.1834852937860413  |
| Ti | 0.9505480966699278  | 0.5038143619786810 | 0.2744489356050633  |

**Table S6.** Coordinates for the Sc-doped system.

|    | X                   | Y                  | Z                  |
|----|---------------------|--------------------|--------------------|
| V  | -0.0451766074501604 | 0.0134358135222976 | 0.1004636425942522 |
| V  | 0.4937553296066067  | 0.0393131137034203 | 0.0955991176958591 |
| V  | 0.0063254144535790  | 0.5120962290323625 | 0.0974688403517291 |
| V  | 0.4558925396000622  | 0.4905777848843141 | 0.1005329115076292 |
| Te | 0.3080466078264945  | 0.3441889186913086 | 0.9930240501480312 |
| Te | 0.1569906593703373  | 0.1565960109249143 | 0.1946390801214208 |
| Te | 0.8102933594304783  | 0.3496505714439382 | 0.0089975695224231 |
| Te | 0.6434163010858376  | 0.1805499392362115 | 0.2042967099952168 |
| Te | 0.3086424718707251  | 0.8510723386385338 | 0.0107864887308197 |
| Te | 0.1487004844279736  | 0.6878271769492850 | 0.2090724401554652 |

|    |                    |                    |                     |
|----|--------------------|--------------------|---------------------|
| Te | 0.8116198656187131 | 0.8433266867054197 | -0.0010050522514250 |
| Te | 0.6276953925037290 | 0.6857810161227620 | 0.1834852937860413  |
| Sc | 0.9505480966699278 | 0.5038143619786810 | 0.2744489356050633  |

**Table S7.** Coordinates for the Ru-doped system.

|    | X                   | Y                  | Z                  |
|----|---------------------|--------------------|--------------------|
| V  | -0.0695644816981439 | 0.0296535947419484 | 0.1007505697185900 |
| V  | 0.4899462304748662  | 0.0448036943954664 | 0.0980842571693720 |
| V  | 0.0057766364307580  | 0.4975931923510243 | 0.0992345172869392 |
| V  | 0.4827248621847122  | 0.4689366331731455 | 0.0971407510533150 |
| Te | 0.3194534072445042  | 0.3430037612406338 | 0.9901610786722219 |
| Te | 0.1621475236027806  | 0.1494548879626679 | 0.2065731565449845 |
| Te | 0.8146179589512736  | 0.3435620074750022 | 0.0038004077504968 |
| Te | 0.6334879767879894  | 0.1867242059629720 | 0.2104907044360134 |
| Te | 0.3035583045078938  | 0.8493424699041855 | 0.0175484241020698 |
| Te | 0.1513744115320400  | 0.6926218076684745 | 0.2071897978530324 |
| Te | 0.8071856434321157  | 0.8390028980540424 | 0.0007263678814257 |
| Te | 0.6173364453809876  | 0.6961974750570115 | 0.1871683216402104 |
| Ru | 0.9587049961825279  | 0.5173333338468749 | 0.2529416738538546 |

**Table S8.** Coordinates for the Y-doped system.

|    | X                   | Y                  | Z                  |
|----|---------------------|--------------------|--------------------|
| V  | -0.0356194629145022 | 0.0040492988510370 | 0.1053644862892512 |
| V  | 0.5079688926648104  | 0.0635383979695588 | 0.0921292942567074 |
| V  | 0.0097051389607546  | 0.5274949926809652 | 0.0966612845804295 |
| V  | 0.4662180345473656  | 0.4949261404856612 | 0.1032128759828463 |
| Te | 0.3114318694793285  | 0.3659842671722137 | 0.9916321580044163 |



---

|    |                    |                    |                     |
|----|--------------------|--------------------|---------------------|
| Te | 0.1784027524635220 | 0.1567868436396311 | 0.1844885918692294  |
| Te | 0.8202667108754131 | 0.3526793417101084 | 0.0106405708046598  |
| Te | 0.6535049032461047 | 0.1857256726190534 | 0.2181202762695050  |
| Te | 0.3147405636117882 | 0.8568224061148324 | 0.0117327521947256  |
| Te | 0.1413186594379893 | 0.6774930343992995 | 0.2082337832112341  |
| Te | 0.8271827347384121 | 0.8463807011712425 | -0.0029796924839210 |
| Te | 0.6264399280880197 | 0.7128751230981695 | 0.1751060905184755  |
| Y  | 0.8551891898152992 | 0.4134737419216760 | 0.2774675564649671  |

---
